# Supplementary material for: Are Health Literacy and Physical Literacy Independent Concepts? A Gender-Stratified Analysis in Medical School Students from Croatia
Source: MDPI journal article supplement (doi:10.3390/children9081231), 2022-08-15
Supplement: s1 [file s1]

# Supplementary

**Table S1.** Correlations between study variables for total sample (\* indicates significance of  $p < 0.05$ ).

|                                            | 1      | 2     | 3      | 4      | 5      | 6      | 7     | 8     | 9     | 10    | 11    | 12    | 13    | 14    | 15    |
|--------------------------------------------|--------|-------|--------|--------|--------|--------|-------|-------|-------|-------|-------|-------|-------|-------|-------|
| Age (1)                                    | 1.00   |       |        |        |        |        |       |       |       |       |       |       |       |       |       |
| Body height (2)                            | -0.08  |       |        |        |        |        |       |       |       |       |       |       |       |       |       |
| Body mass (3)                              | 0.03   | 0.53* |        |        |        |        |       |       |       |       |       |       |       |       |       |
| BMI (4)                                    | 0.00   | 0.11  | 0.90*  |        |        |        |       |       |       |       |       |       |       |       |       |
| Fat mass kg (5)                            | -0.01  | 0.40* | 0.95*  | 0.91*  |        |        |       |       |       |       |       |       |       |       |       |
| Fat mass % (6)                             | -0.03  | 0.32* | 0.85*  | 0.84*  | 0.96*  |        |       |       |       |       |       |       |       |       |       |
| Free fat mass (7)                          | 0.09   | 0.57* | 0.81*  | 0.66*  | 0.65*  | 0.49*  |       |       |       |       |       |       |       |       |       |
| Muscle mass (8)                            | 0.09   | 0.62* | 0.88*  | 0.71*  | 0.69*  | 0.52*  | 0.92* |       |       |       |       |       |       |       |       |
| Visceral fat (9)                           | -0.17  | 0.29* | 0.86*  | 0.92*  | 0.91*  | 0.85*  | 0.52* | 0.62* |       |       |       |       |       |       |       |
| PLAYself <sub>environment</sub> (10)       | -0.20* | 0.08  | -0.16* | -0.15* | -0.19* | -0.19* | -0.03 | -0.09 | -0.15 |       |       |       |       |       |       |
| PLAYself <sub>self-description</sub> (11)  | -0.07  | 0.12  | -0.10  | -0.09  | -0.14  | -0.16* | -0.03 | -0.04 | -0.17 | 0.59* |       |       |       |       |       |
| PLAYself <sub>literacy</sub> (12)          | 0.13   | -0.08 | 0.03   | 0.02   | 0.02   | 0.03   | 0.03  | 0.03  | 0.15  | 0.08  | 0.17* |       |       |       |       |
| PLAYself <sub>numeracy</sub> (13)          | 0.12   | -0.10 | 0.00   | 0.01   | -0.05  | -0.07  | 0.10  | 0.06  | -0.02 | -0.04 | 0.13  | 0.33* |       |       |       |
| PLAYself <sub>physical literacy</sub> (14) | 0.03   | -0.04 | 0.07   | 0.04   | 0.03   | 0.00   | 0.10  | 0.09  | -0.02 | 0.20* | 0.35* | 0.32* | 0.33* |       |       |
| PLAYself total (15)                        | -0.05  | 0.05  | -0.08  | -0.08  | -0.12  | -0.14  | 0.03  | -0.01 | -0.12 | 0.67* | 0.88* | 0.41* | 0.38* | 0.58* |       |
| HLS- EU-Q (16)                             | 0.19*  | 0.03  | 0.08   | 0.12   | 0.10   | 0.11   | 0.08  | 0.04  | -0.03 | 0.09  | 0.26* | 0.20* | 0.27* | 0.12  | 0.31* |

Legend: PLAY = Physical literacy Assessment of Youth; HLS-EU-Q = European Health Literacy Survey Questionnaire
